# Cumulative Effects of Dibutyl Phthalate and Diethylhexyl Phthalate on Male Rat Reproductive Tract Development: Altered Fetal Steroid Hormones and Genes

Kembra L. Howdeshell,\*† Johnathan Furr,† Christy R. Lambright,† Cynthia V. Rider,\* Vickie S. Wilson,† and L. Earl Gray Jr†<sup>1</sup>

\*North Carolina State University, Department of Molecular Biomedical Sciences, Raleigh, North Carolina 27606; †U.S. Environmental Protection Agency, Office of Research and Development, National Health and Environmental Effects Research Laboratory, Reproductive Toxicology Division (MD-72), Endocrinology Branch, Research Triangle Park, North Carolina 27711

Received February 12, 2007; accepted March 12, 2007

Exposure to plasticizers di(n-butyl) phthalate (DBP) and diethylhexyl phthalate (DEHP) during sexual differentiation causes male reproductive tract malformations in rats and rabbits. In the fetal male rat, these two phthalate esters decrease testosterone (T) production and insulin-like peptide 3 (*insl3*) gene expression, a hormone critical for gubernacular ligament development. We hypothesized that coadministered DBP and DEHP would act in a cumulative dose-additive fashion to induce reproductive malformations, inhibit fetal steroid hormone production, and suppress the expression of *insl3* and genes responsible for steroid production. Pregnant Sprague Dawley rats were gavaged on gestation days (GD) 14–18 with vehicle control, 500 mg/kg DBP, 500 mg/kg DEHP, or a combination of DBP and DEHP (500 mg/kg each chemical; DBP + DEHP); the dose of each individual phthalate was one-half of the effective dose predicted to cause a 50% incidence of epididymal agenesis. In experiment one, adult male offspring were necropsied, and reproductive malformations and androgen-dependent organ weights were recorded. In experiment two, GD18 testes were incubated for T production and processed for gene expression by quantitative real-time PCR. The DBP + DEHP dose increased the incidence of many reproductive malformations by  $\geq 50\%$ , including epididymal agenesis, and reduced androgen-dependent organ weights in cumulative, dose-additive manner. Fetal T and expression of *insl3* and *cyp11a* were cumulatively decreased by the DBP + DEHP dose. These data indicate that individual phthalates with a similar mechanism of action, but with different active metabolites (mono-butyl phthalate versus monoethylhexyl phthalate), can elicit dose-additive effects when administered as a mixture.

**Disclaimer:** The research described in this article has been reviewed by the National Health and Environmental Effects Research Laboratory, U.S. Environmental Protection Agency, and has been approved for publication. Approval does not necessarily reflect the views and policies of the agency nor does mention of trade names or commercial products constitute endorsement or recommendation for use.

<sup>1</sup>To whom correspondence should be addressed. Fax: (919) 541-4017. E-mail: gray.earl@epa.gov.

**Key Words:** endocrine disruptors; developmental toxicity; post-natal; epididymis; RT-PCR; reproductive tract; male; phthalates.

Phthalate esters are a high-production volume group of chemicals used to impart flexibility to polyvinyl plastics and other materials, including medical dialysis tubing and intravenous bags, pharmaceuticals, cosmetics, and personal care products, and plastic food wrap. Phthalates and/or their metabolites can leach from such products and have been detected in the environment (Kolpin *et al.*, 2002) and in the saliva and urine of children and adults (Blount *et al.*, 2000; Silva *et al.*, 2004a, 2005). Infants may be exposed to phthalates in the womb via maternal circulation (Latini *et al.*, 2003; Silva *et al.*, 2004b), breastfeeding (Mortensen *et al.*, 2005), or via medical devices in neonatal intensive care units (Green *et al.*, 2005).

Prenatal exposure to some phthalate esters during the period of sexual differentiation inhibits male reproductive development in laboratory rodents. *In utero* exposure to either dibutyl phthalate (DBP) or diethylhexyl phthalate (DEHP) leads to an increased incidence of reproductive malformations and reduced androgen-dependent organ weights in adult male rats (Gray *et al.*, 2000), which indicate a suppression of androgen and insulin-like peptide 3 (*insl3*), a hormone responsible for gubernacular ligament development (Ivell and Bathgate, 2002; McKinnell *et al.*, 2005; Wilson *et al.*, 2004; Zimmermann *et al.*, 1999). Unlike some antiandrogens, phthalate esters do not interact with the androgen receptor at physiological concentrations (Gray *et al.*, 2006b; Parks *et al.*, 2000). *In utero* exposure to either DBP or DEHP (750 mg/kg/day) reduces fetal testosterone (T) synthesis (Parks *et al.*, 2000) and inhibits *insl3* mRNA expression. Therefore, DBP and DEHP share a similar mode of action of suppressing the testicular androgen synthesis and *insl3* expression in fetal rats, which results in adverse effects on the male rat reproductive tract.

While risk assessments have traditionally been done on a chemical by chemical basis, the Food Quality Protection Act of 1996 requires the United States Environmental Protection Agency (US Congress, 1996) to evaluate the cumulative risk of chemicals which share a similar mechanism of action. However, few experiments to date have tested the effects of prenatal exposure to combinations of antiandrogenic chemicals (Gray *et al.*, 2006b; Hotchkiss *et al.*, 2004). Recent reports from health advocacy groups have emphasized the need for testing combinations of phthalates to better assess the health risks of known human exposure to multiple sources of these chemicals (DiGangi *et al.*, 2002; Purvis and Gibson, 2005), while other organizations have responded that this approach is not scientifically grounded (Stanley, 2002).

In the current study, we hypothesized that prenatal exposure of male rats to a mixture of two phthalates with the same mechanism of action, but different active metabolites, would act in a cumulative, dose-additive fashion to (1) increase the frequency of reproductive malformations, (2) decrease androgen-dependent organ weights, and (3) inhibit fetal testicular steroid hormone production and gene expression profiles. To address this hypothesis, we studied male rats prenatally exposed to DBP (active metabolite = monobutyl phthalate [MBP]; Tanaka *et al.*, 1978; Williams and Blanchfield, 1975) or DEHP (active metabolite = monoethylhexyl phthalate [MEHP]; Albro and Lavenhar, 1989) or a combination of both chemicals during the fetal period of sexual differentiation (gestation days [GD] 14–18). We predicted that an oral dose of 500 mg/kg/day of DBP or DEHP to the rat dam during GD14–18 would be approximately half of the total effective dose which produces a 50% incidence ( $ED_{50}$ ) of epididymal agenesis. Our prediction was based on a study from our laboratory which observed 0% incidence of epididymal and testicular malformations in Long Evans rats treated with 500 mg/kg/day DBP during 4 days of sexual differentiation (Gray *et al.*, 1999). Epididymal agenesis is one of the most common reproductive malformations associated with prenatal phthalate exposure in laboratory rats (Gray *et al.*, 2000; Mylchreest *et al.*, 2000). In addition, we compared the observed effects for each reproductive end point of the phthalate mixture dose to predictions of dose and response addition, which were based on a preliminary dose-response study which administered DBP or DEHP at several dosage levels during sexual differentiation (Gray, unpublished data). We emphasize that the objective of the current study was not to establish a low adverse effects level (LOAEL) for subtle end points like anogenital distance (AGD) or nipple retention but rather to observe whether well-characterized doses of DBP and DEHP (each of which at sub- or at near threshold levels for causing epididymal malformations) would work in a dose-additive fashion such that the phthalate mixture would be the  $ED_{50}$  for this malformation. Since we suspect that the reproductive effects in the male offspring result from abnormal Leydig cell migration (Mahood *et al.*, 2005) and delayed onset of

expression of the genes for the steroidogenic enzymes and *insl3* peptide hormone (Thompson *et al.* 2004), we predicted that these endocrine measures would also be cumulatively affected by the mixture of DBP with DEHP. To test for cumulative effects of phthalate exposure on fetal hormone synthesis, rat dams were euthanized on GD18, and fetal rat testes were collected for an assessment of: (1) T production and (2) expression levels of *insl3* and genes related to steroid production and sexual differentiation.

## MATERIALS AND METHODS

### General Methods

**Animals.** Adult female Sprague Dawley (SD) rats (Charles River, Raleigh, NC) were mated by the supplier and shipped on GD2. Mating was confirmed by sperm presence in vaginal smears (day of sperm plug positive = GD1). Animals were housed individually in 20 × 25 × 47 cm clear polycarbonate cages with laboratory-grade heat-treated pine shavings (Northeastern Products, Warrensburg NY) with a 14:10 light/dark photoperiod (lights off at 1100 h) at 20–24°C. Pregnant and lactating females were fed Purina Rat Chow 5008, and weaning and adult rats were fed Purina Rat Chow 5001 *ad libitum*. Animals were provided access to filtered (5 µm filter) municipal drinking water (Durham, NC) *ad libitum*. Water was tested monthly for *Pseudomonas* and every 4 months for a suite of chemicals including pesticides and heavy metals. The current study was conducted under protocols approved by the National Health and Environmental Effects Research Laboratory Institutional Animal Care and Use Committee.

**Doses and administration of chemicals.** Two separate experiments were conducted. In each experiment, pregnant rat dams were assigned to treatment groups on GD14 in a manner that provided similar mean ( $\pm$  SE) body weight per treatment group prior to dosing. Laboratory-grade corn oil (CAS 8001-30-7, lot #89H0149), DBP (CAS 201-557-4, purity = 99%, lot 81K0429), and DEHP (CAS 204-211-0, purity = 99%, lot 101K3696) were purchased from Sigma (St Louis, MO). Animals were gavaged from GD14 through GD18 with 0 (vehicle control), DBP (500 mg/kg/day), DEHP (500 mg/kg/day), or a combination of DBP and DEHP (DBP + DEHP; 500 mg/kg/day each) dissolved in corn oil. The doses were delivered in 2.5 µl corn oil per gram body weight. The rat dams were weighed daily during the dosing period to administer the dose per kilogram body weight and to observe the health of the dams.

### Developmental Study

**Neonatal and pubertal data.** Control and treated dams ( $n = 6$  litters per treatment) were allowed to deliver naturally. At postnatal day 3 (PND3; day of birth = PND1), individual pup weights were recorded. AGD was measured using a dissecting scope at ×15 with an ocular micrometer as per Hotchkiss *et al.* (2004); the observer measuring AGD was blinded as to the pup's treatment group. The AGD was defined as the distance between the base of the genital papilla and the rostral end of the anal opening. At PND14, male offspring were reweighed and examined for presence or absence of areolae or nipples. Male rat pups do not normally retain areolae since their higher levels of endogenous androgens, relative to females, cause regression of the nipple anlagen *in utero*. At PND22, pups were weaned and males were weighed and housed two siblings per cage. The rat dams were euthanized after weaning the pups, and the number of uterine implants was recorded.

**Necropsy.** Males were necropsied when they reached at least 7 months old following CO<sub>2</sub> anesthesia and decapitation. Blood was collected for determination of serum T and males were necropsied. The ventral surface of each male was shaved and examined for abnormalities, including the number and location of retained nipples, and hypospadias. The animals were examined

internally for additional reproductive malformations, including epididymal agenesis, gubernacular malformations (e.g., agenesis and elongated underdevelopment of gubernacular ligaments), testicular malformations (e.g., testicular atrophy, cryptorchid testes, fluid-filled testes), and vas deferens, prostatic, and seminal vesicular agenesis. Gubernacular underdevelopment is characterized by thread-like gubernacular cords measuring longer than the normal length of 11 mm. Gubernacular ligaments measuring > 11–14 mm were considered mildly underdeveloped (but were scored as normal), while gubernacular ligaments measuring > 14 mm in length were considered markedly underdeveloped and were counted as gubernacular malformations. Organ weights were recorded for the following: glans penis, ventral prostate, seminal vesicles, testes, epididymides, levator ani/bulbocavernosus (LABC) muscle, Cowper's glands, kidneys, and liver. The incidence of total percent malformed males was calculated by adding together the number of males that had any occurrence of the following malformations at necropsy: nipple retention, hypospadias, vas deferens agenesis, ventral prostate agenesis, seminal vesicle agenesis, testes malformations, epididymal agenesis, and gubernacular agenesis/hypoplasia.

Testes were preserved in Bouin's solution for 24 h then transferred into 70% ethanol until histological examination. Three transverse sections of the testes (through the rete, middle, and caudal regions) were stained with hematoxylin and eosin to observe any histopathology to validate any effects that were observed during necropsy as well as to detect any testicular lesions that were not evident at necropsy.

**Serum T radioimmunoassay.** At necropsy, a blood sample was collected for each animal. The blood was allowed to clot at 4°C for a minimum of 30 min in Vacutainer serum separator tubes (Becton Dickinson, Franklin Lakes, NJ), then centrifuged at 1000 × g for 15 min at 4°C. The serum was stored in Eppendorf tubes at – 80°C until assayed by radioimmunoassay (RIA). T was measured in 50 µl sera by RIA using Coat-a-Count kits according to manufacturer's protocols (Diagnostic Products Corporation, Los Angeles, CA). The level of detection of the RIA was 0.2 ng/µl T. Data are presented as litter means (± SE).

#### Fetal Endocrine and Gene Expression Study

This study consisted of three experimental blocks with two dams per treatment for a total number of six control dams, six DBP-treated dams, six DEHP-treated dams, and six dams receiving the combination dose of DBP and DEHP (DBP + DEHP). A total of three male fetuses per litter were evaluated for hormone production, and fetal testes were pooled by litter for the gene expression end points.

**Fetal necropsy.** On the morning of GD18, the rat dams were anesthetized with CO<sub>2</sub> and killed by decapitation. Fetuses were immediately removed, anesthetized, and killed on ice, and testes were removed under a dissecting microscope. Testes from the first three males were immediately transferred to M199 media without phenol red for *ex vivo* testis hormone production as per Wilson *et al.* (2004). Each individual testis was placed in a separate well for a total of two hormone production measurements per fetus, which resulted in six measurements per litter. Remaining testes were quickly transferred to TRI-Reagent (Sigma) in sterile 1.5 µl microcentrifuge tubes, homogenized with a Kontes pestle homogenizer on ice, and stored at – 80°C until RNA isolation; testes were pooled per litter. Dissections were conducted within a 2 h period between 830 and 1030 Eastern Standard Time.

**Ex vivo testis hormone production.** Fetal testicular hormone production was evaluated as per Wilson *et al.* (2004). Following incubation, the media was stored in siliconized Eppendorf tubes and stored at – 80°C until hormone RIA. The incubated testes were immediately transferred to TRI-Reagent (Sigma), pooled by litter, and stored at – 80°C for subsequent RNA analysis. T and progesterone (P4) levels in the media were measured by RIA using Coat-a-Count kits according to manufacturer's protocols (Diagnostic Products Corporation). The limits of detection of the RIAs were 0.2 ng/µl T and 0.1 ng/µl P4. Data are presented as litter means.

**Quantitative real-time PCR (qRT-PCR).** Testicular RNA was isolated from the TRI-Reagent homogenized samples as per manufacturer's instructions and quality of the RNA samples was verified by Agilent Bioanalyzer (Hercules, CA). RNA was digested with DNase I (Promega, Madison WI) and quantified by RiboGreen quantitation assay (Molecular Probes, Invitrogen, Carlsbad, CA) according to manufacturer's instructions. Prior to qRT-PCR analysis, RNA samples (0.5 µg/reaction) were digested with DNase 1 and synthesized into cDNAs in a 20.9 µl reverse transcriptase reaction as per manufacturer's instructions. The reverse transcriptase reaction began with 500 ng DNase RNA (11 µl volume) and 1 µl random hexamer primers (0.5 µg/µl) heat denatured at 70°C for 5 min and then chilled on ice. The remaining ingredients were added to each reaction: 4 µl 5× Improm buffer, 2.4 µl 25mM MgCl<sub>2</sub>, 1 µl 25mM deoxynucleoside triphosphate (dNTP), 0.5 µl RNasin RNase inhibitor, and 1 µl Improm reverse transcriptase enzyme. The reaction was annealed at 25°C for 5 min, first strand extended at 42°C for 60 min, heat inactivated at 70°C for 15 min, and cooled to 4°C. Finally, reactions were diluted to 20 ng/µl cDNA with the addition of 28.6 µl DEPC-treated dH<sub>2</sub>O; the RNA to cDNA ratio was considered 1:1.

The qRT-PCR was performed on a BioRad iCycler real-time detection system (Hercules, CA). Primer sets and primer-specific, dual-labeled fluorescent probes (5'-Fam-labeled and 3'-Black Hole Quencher 1) specific to rat, or mouse and rat, were synthesized by Integrated DNA Technologies (Coralville, IA; Table 1). The qRT-PCRs were carried out in a 50-µl volume containing 5 µl cDNA sample (50 ng/reaction), 1× PCR buffer, 0.4mM each dNTP, 8 or 16 µl of 25mM MgCl<sub>2</sub> (inl3, 8 µl; other primers, 16 µl), 12 pmol reverse primer, 12 pmol forward primer, 1.25 pmol fluorescent probe, 0.5 U Platinum Taq DNA Polymerase (Invitrogen) with Taq antibody added, and DEPC-treated dH<sub>2</sub>O. An internal standard curve was run in each assay with serial dilutions ranging from 1 × 10<sup>8</sup> to 1 × 10<sup>4</sup> copies per reaction so that an absolute determination of the starting quantity (SQ) of the cDNA sample could be determined. The cDNA standards were made by PCR, purified by phenol extraction and isopropanol precipitation, and quantified by RiboGreen quantitation reagent as stated above. Real-time PCR cycling conditions were an initial heat denaturation step of 95°C for 3 min, followed by multiple cycles of 95°C for 15 s, 56°C for 20 s, and 72°C for 10 s. Reactions were completed with a final annealing step at 72°C for 10 min. For each real-time PCR assay, all samples and standards were run in duplicate on a single plate. In cases where the data were collected in two separate real-time PCR runs, we assigned the samples to the two runs with all treatment groups equally distributed on each PCR plate to avoid confounding the effects of treatment with the effects of a different PCR plate.

**Statistics.** The data were analyzed using two-way ANOVA on the general linear measures procedures from the Statistical Analysis Systems (SAS, Inc., Cary, NC). *Post hoc* comparisons were made using the Least Squared Means

TABLE 1  
Primer and Probe Sequences for Real-Time Quantitative RT-PCR Analyses

| Gene          | Primer and probe set                                                                                                   |
|---------------|------------------------------------------------------------------------------------------------------------------------|
| <i>inl3</i>   | Forward 5'-TGGCCACCAACGCTGTG-3'<br>Reverse 5'-ACCCAAAAGGTCTTGCTGGG-3'<br>Probe 5'-ACCGTGCTGTCTCACTGGCTGC-3'            |
| <i>cyp11a</i> | Forward 5'-GGGACTTAAGCAGAAGCGA-3'<br>Reverse 5'-ATGTTCTTGAAGGGCAGCTTG-3'<br>Probe 5'-AGTACCCTGGTGTCTTTATAGCCTCCTGGG-3' |
| <i>sf-1</i>   | Forward 5'-TGTGCGTGCTGATCGAATG-3'<br>Reverse 5'-GGCCGAATCTGTGCTTTC-3'<br>Probe 5'-CAAGAGAGACCGGGCCTTGAAGCA-3'          |
| <i>StAR</i>   | Forward 5'-AGAAGGAAAGCCAGCAGGAGA-3'<br>Reverse 5'-TCTCCCATGGCCTCCATG-3'<br>Probe 5'-TAGACCAGCCCATGGACAGACTCTATGAAGA-3' |

procedure on SAS, which is appropriate for *a priori* hypotheses. We expected treatments to reduce organ weights and AGD in male offspring but increase androgen- and ins13-dependent tissue malformation rates. For analysis of treatment effects, litter means were used as the sample size versus the number of animals. Differences were considered significant at  $p \leq 0.05$ . The data of percent retention rate of areolae/nipples were arcsine transformed prior to statistical analysis to normalize the data. If organs were absent at the time of necropsy, their weight was recorded as 0 g (e.g., some phthalate-treated males lacked entire epididymides). Individual organ weight data were examined statistically by two-way ANOVA and Fisher's exact test or chi-square analyses (Sigma Stat, Systat Software, San Jose, CA) because it was evident from the scatter plot graphs that the litter means analysis could obscure severe effects when the effects were limited to a small percentage of the male offspring. As reproductive organ weights are not correlated with body weight, the organ weights of the current study were not adjusted by body weight. Histopathological observations of the testes were statistically analyzed using the Fisher's exact test (Sigma Stat).

The data of fetal testicular T and P4 production were analyzed using litter means generated by pooling the individual data within a litter. The gene expression data were analyzed for the effects of treatment and PCR plate (since the samples were divided between two PCR plates per primer set) as well as the interaction between the treatment and PCR plate. The RNA from incubated versus nonincubated testes were run on two separate PCR plates for all genes except *sf-1*. For *sf-1*, RNA from both incubated and non-incubated testes were run on the same plate and incubation type was compared. If there was no interaction between PCR plate and treatment, the PCR results were pooled per litter. The significance values of the gene expression data reflect the *post hoc* comparisons of the log-transformed SQ of each gene.

**Estimation of dose versus response addition.** The frequency of reproductive malformations and the percent reduction in reproductive tissue weights were used to determine whether the DBP + DEHP mixture was exerting dose versus response additive effects as described by Rider and LeBlanc (2005). Necropsy data from a preliminary dose-response study of the individual phthalates DBP and DEHP (250–1000 mg/kg/day from GD14–18 in SD rats; Gray, unpublished data) were fitted to the following logistic equation using Origin software (Microcal Software Inc., Northampton, MA), which represents the sigmoidal fit of the data:

$$R = \left( \frac{1}{1 + \frac{ED50^\rho}{D}} \right) \quad (\text{formula 1})$$

where  $R$  is the response,  $D$  is the daily dose,  $\rho$  is the slope of the curve, and ED50 is the dose resulting in a 50% effect (formula 1).

Dose addition, referred to as concentration addition in Rider and LeBlanc (2005), is predicted to occur if two chemicals work through the same mechanism of action. In order to account for interexperimental variability, we calibrated the previously determined dose-response curves using the data from the current study. The formula for the ED50 (shown below; formula 2) is simply the logistic equation mentioned above solved for the ED50:

$$ED50 = \left[ (1 - R) \left( \frac{D^\rho}{R} \right) \right]^{\frac{1}{\rho}} \quad (\text{formula 2})$$

where  $R$  is the response,  $D$  is the daily dose in the current study, and  $\rho$  is the slope of the curve for DBP or DEHP derived from the preliminary dose-response studies. A dose-addition model was used to calculate the DBP + DEHP mixture response using the ED50 for the current study and the previously determined slopes for the individual phthalates with the following formula (formula 3):

$$R = \frac{1}{1 + \left( \sum_{i=1}^n \frac{D_i}{ED50_i} \right)^\rho} \quad (\text{formula 3})$$

where  $R$  is the response of the mixture,  $D_i$  is the dose of individual chemical  $i$  in the mixture,  $ED50_i$  is the dose of chemical causing a 50% response, and  $\rho$  is the average slope associated with the two phthalates in this mixture.

Response addition is expected when two chemicals in the mixture operate via different mechanisms of action and was calculated using the following equation (formula 4):

$$R = 1 - \prod_{i=1}^n (1 - R_i) \quad (\text{formula 4})$$

where  $R$  represents the response to the mixture and  $R_i$  is the response to individual chemical  $i$  in the mixture. Statistical differences between dose or response addition estimates and the observed DBP + DEHP mixture values were determined using Fisher's exact test (Sigma Stat) for the percent incidence data, such as percent incidence of reproductive malformations and areola/nipple retention (expressed as % of 12 possible areola/nipple). Statistical differences between dose or response addition estimates and observed DBP + DEHP mixture effects were determined by 99% confidence mean limits (Statistical Analysis Systems) for the continuous data, such as percent reductions in AGD at PND3 and percent reduction in adult organ weights, fetal hormone production, and fetal gene expression relative to controls. The dose and response addition estimates were made using the individual means, not the litter means, for the effects of DBP or DEHP administered individually from both the preliminary dose response and the current DBP + DEHP mixture studies for all the postnatal end points. Response addition estimates for reductions in fetal hormone production and gene expression were estimated based on litter means. Dose addition for the fetal end points could not be calculated because these end points were not evaluated in the preliminary dose-response study. Finally, observed effects that statistically exceeded both response and dose additions were classified as synergy (i.e., greater than additive effects).

## RESULTS

### Maternal and Pregnancy Data

There were no treatment differences in the mean body weights of dams at culmination of treatment (GD18; Table 2), and all dams appeared healthy. However, the maternal weight gain, defined as the difference between GD14 and GD18 body weight, was reduced by 11.5 g in DEHP dams ( $p < 0.05$ ) and by 20.8 g in DBP + DEHP dams ( $p < 0.001$ ) relative to controls. Fetal/neonatal mortality, which we defined as the difference between the number of uterine implantations and the number of live pups on PND3, was significantly increased in the DBP + DEHP-treated litters relative to controls ( $p < 0.005$ ; Table 2). The average number of live pups per litter (litter size) was smaller ( $p < 0.001$ ) with seven pups per DBP + DEHP litter versus 13 pups per control litter. The litter sizes of DBP and DEHP-exposed dams were not significantly different from controls (Table 2). Of the six DBP + DEHP dams, one dam died due to an accident during dosing. Another DBP + DEHP dam had 1 live pup and 10 dead pups at PND3 and no pups at weaning on PND22.

### Neonatal and Infant Data

Body weight on PND3 was unaffected by treatment in both male and female pups (Table 2). AGD was significantly

**TABLE 2**  
**Maternal Body Weight and Litter Characteristics After Prenatal Exposure to Control (Corn Oil), DBP, DEHP, or DBP + DEHP (500 mg/kg/day per Individual Chemical) from GD14–18**

|                                            | Control       | DBP          | DEHP                     | DBP + DEHP               |
|--------------------------------------------|---------------|--------------|--------------------------|--------------------------|
| No. of litters on PND3                     | 6             | 6            | 6                        | 5                        |
| Maternal body weight at GD14               | 280.7 ± 7.97  | 296.8 ± 2.91 | 292.5 ± 4.80             | 293.6 ± 4.74             |
| Maternal body weight at GD18               | 319.8 ± 11.92 | 328.2 ± 2.41 | 320.2 ± 5.70             | 312.0 ± 6.80             |
| Maternal body weight gain (g) <sup>a</sup> | 39.2 ± 5.06   | 31.3 ± 1.17  | 27.7 ± 1.94 <sup>b</sup> | 18.4 ± 5.65 <sup>c</sup> |
| No. of implantation scars                  | 13.5 ± 1.06   | 15.3 ± 0.49  | 14.2 ± 0.79              | 14.8 ± 0.66              |
| Litter size at PND3 (pups)                 | 12.5 ± 0.76   | 13.7 ± 0.42  | 13.7 ± 0.84              | 7.4 ± 2.50 <sup>c</sup>  |
| Fetal and neonatal mortality <sup>d</sup>  | 1.0 ± 0.68    | 1.67 ± 0.61  | 0.5 ± 0.34               | 7.4 ± 3.08 <sup>e</sup>  |
| Male F1 body weight at PND3 (g)            | 8.86 ± 0.18   | 8.80 ± 0.26  | 8.98 ± 0.35              | 8.11 ± 0.93              |
| Female F1 body weight at PND3 (g)          | 8.53 ± 0.10   | 8.31 ± 0.11  | 8.54 ± 0.13              | 8.80 ± 0.19              |

<sup>a</sup>Maternal weight gain defined as the difference between body weight on GD18 and GD14.

<sup>b</sup>Indicates value differs from control by  $p < 0.05$ . Values are litter mean ± SEM.

<sup>c</sup>Indicates value differs from control by  $p < 0.001$ . Values are litter mean ± SEM.

<sup>d</sup>Fetal mortality is defined as the difference between observed implantation number and number of pups on PND3; day of birth = PND1.

<sup>e</sup>Indicates value differs from control by  $p < 0.005$ . Values are litter mean ± SEM.

reduced in male pups by all phthalate treatments versus control with a 9% decrease for DBP ( $p < 0.05$ ), a 10% decrease for DEHP ( $p < 0.05$ ), and a 28% decrease in DBP + DEHP ( $p < 0.0001$ ) on PND3 (Fig. 1a). On PND14, the number of areolae retained per male pup was significantly increased by prenatal phthalate treatments relative to controls. There was a cumulative increase in the abundance of areolae per male observed in the DBP + DEHP treatment group (63-fold increase,  $p < 0.0005$ ) compared to the single phthalate treatments (DBP = 20-fold increase, not significant; DEHP = 23-fold increase,  $p = 0.08$ ). Phthalate exposure also significantly increased the percent of male pups with areolae with 41.3 ± 18.7% for DBP ( $p < 0.05$ ), 55.8 ± 16.4% for DEHP ( $p < 0.01$ ), and 100 ± 0% for DBP + DEHP ( $p < 0.0005$ ) exposures relative to control values of 6.3 ± 6.3%; the control treatment group had one litter with three males possessing areolae.

#### Necropsy Data

While the male body weight in adulthood did not reach overall significance by  $F$ -statistic on ANOVA ( $F = 2.04$ ,  $p = 0.1444$ ), adult male body weight was significantly reduced ( $p < 0.05$ ) by the DBP + DEHP dose relative to controls as determined by individual *post hoc t*-test analyses of litter means compared to control values. Body weight was not affected by either DBP or DEHP treatment alone (Table 3). The number of permanent nipples per adult male was significantly higher ( $p < 0.005$ ) in the DBP + DEHP treatment relative to controls and tended to be higher in the DEHP treatment ( $p = 0.06$ ; Fig. 1c). Likewise, the percent of adult males with nipples was increased by prenatal phthalate exposure relative to control males with the most dramatic effects seen in the DBP + DEHP males. The percent of adult males with nipples was 21.8 ± 13.4% for DBP (not significant), 41.3 ± 16.7% for DEHP ( $p <$

0.05), and 82.5 ± 7% for DBP + DEHP ( $p < 0.0005$ ) versus 0% nipple retention in the controls.

The combination dose of DBP + DEHP significantly increased the incidence of penile abnormalities (Fig. 2). Hypospadias occurred in 43.3% of DBP + DEHP males, compared to the absence of this effect in controls. In contrast, the DEHP-treated males exhibited only a low frequency of hypospadias (1.9% of males), and the DBP-treated males exhibited no genital abnormalities.

Phthalate treatment induced several internal malformations with the greatest incidence of malformations occurring with DBP + DEHP exposure. Treatment with DBP + DEHP significantly increased the incidence of testicular malformations by 74.2% ( $p < 0.0005$ ), epididymal agenesis by 65.9% ( $p < 0.001$ ), and gubernacular malformations by 61.5% ( $p < 0.005$ ; Fig. 2). In contrast, neither the DBP nor DEHP individual chemical treatments caused a significant increase in the incidence of these reproductive malformations (Fig. 2). Of the DBP + DEHP males with gubernacular malformations, 25% of the males lacked one or both gubernacular ligaments, and 35% of the males had one or both gubernacular ligaments measuring greater than double the normal length of 11 mm with a range of 26.5–57.5 mm gubernacular length (Figs. 3a and 3b). The absence of both gubernacular ligaments in one DBP + DEHP male resulted in crossed testes, in which the testes descended into the contralateral scrotal sacs and the right and left spermatic arteries as well as vas deferens crossed over one another (Fig. 3c). Seminal vesicle abnormalities (agenesis and small lobes) occurred most frequently in DBP + DEHP-treated males (63.1%;  $p < 0.001$ ), 11.1% (NS) of the DEHP males, and were not found in the control or DBP-treated males. Agenesis of the vas deferens was induced by all phthalate treatments reaching statistical significance ( $p < 0.001$ ) only in the DBP + DEHP-treated males relative to controls (Fig. 2).

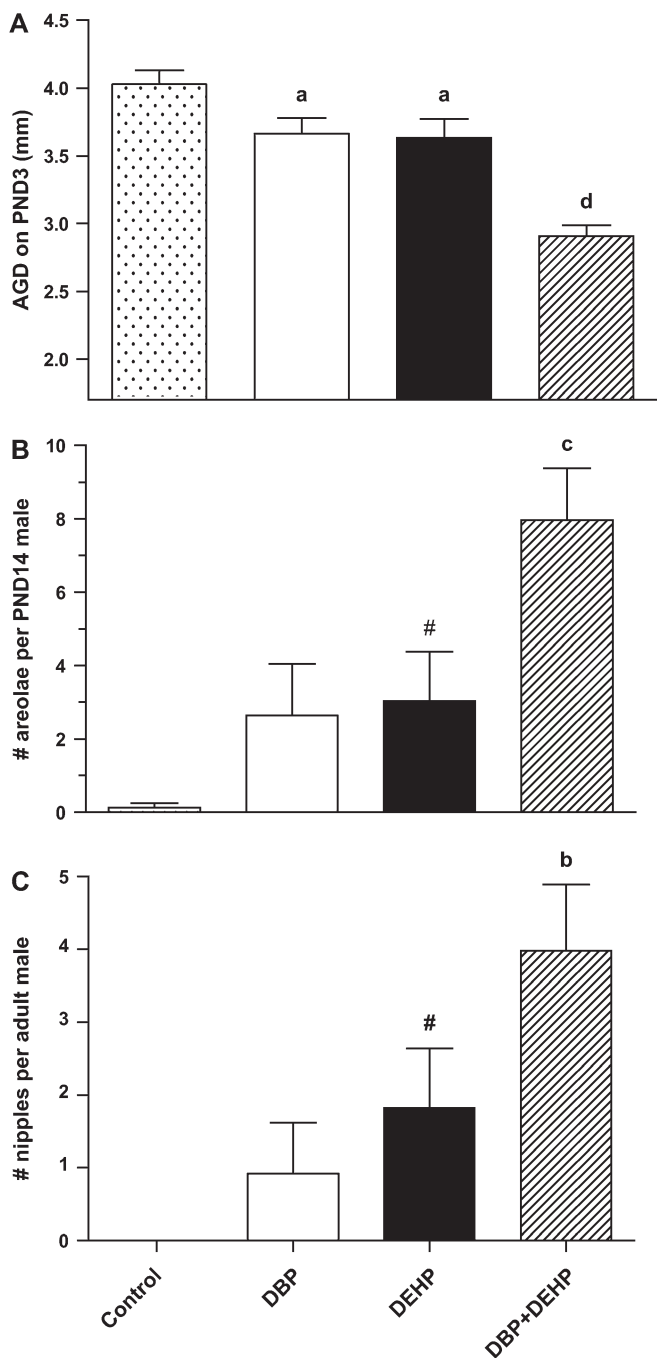

**FIG. 1.** AGD on PND3 (A) and number of areolae retained on PND14 (B) in adulthood (7–11 months old) and (C) in male rats prenatally exposed to corn oil (control), DBP (500 mg/kg/day), and/or DEHP (500 mg/kg/day) on GD14–18. <sup>a</sup> $p < 0.05$ , <sup>b</sup> $p < 0.005$ , <sup>c</sup> $p < 0.0005$ , <sup>d</sup> $p < 0.0001$ , and <sup>#</sup> $p = 0.06$ – $0.08$  versus controls.  $n = 6$  litters per treatment, except DBP + DEHP with  $n = 4$  litters. Values are litter mean  $\pm$  SEM. Note that the baseline on the AGD graph is set at 1.7 mm, the value of the females in the current study.

There were no gross, morphological ventral prostate malformations noted for any treatment group (data not shown).

The male reproductive organ weights were significantly decreased by the DBP + DEHP combination treatment (Table 3).

The DBP + DEHP treatment significantly ( $p < 0.005$ ) reduced glans penis weight by 8.3% relative to controls. Ventral prostate weight was reduced by 26.6% ( $p < 0.05$ ), and paired seminal vesicle weight was reduced by 54% ( $p < 0.005$ ) in the DBP + DEHP group versus control values. The DBP + DEHP treatment also significantly reduced paired testes weight by 35.8% ( $p < 0.0005$ ) and paired epididymal weight by 58% ( $p < 0.0005$ ) relative to control values. Prenatal exposure to DBP or DEHP alone did not significantly reduce the litter means of androgen-dependent reproductive organ weights with the exception of the LABC. The LABC muscle was one of the most sensitive tissues to individual phthalate doses, and it demonstrated a cumulative weight reduction with the combination dose. The paired Cowper's gland weight was not affected by phthalate exposure (control,  $227.58 \pm 22.56$  mg; DBP,  $220.38 \pm 15.76$  mg; DEHP,  $230.97 \pm 11.09$  mg; and DBP + DEHP,  $202.89 \pm 22.59$  mg).

While the analysis of litter means indicated significant organ weight reductions principally with the combination dose, a scatter plot analysis of individual organ weights indicated that there was a sensitive subpopulation of males that were significantly affected by either DBP or DEHP alone (Figs. 4A–D). For example, using a two-way ANOVA, the means of individual epididymal and testis weights, paired seminal vesicle, and LABC weights were significantly reduced by the DEHP and DBP + DEHP doses (Figs. 4A and 4C). The DBP treatment significantly reduced LABC weights ( $p < 0.05$  as in the litter means analysis) and tended ( $p = 0.07$ ) to decrease seminal vesicle weights. Similar results were calculated by Fisher's exact test (LABC and seminal vesicles) or chi-square analysis (testes and epididymides) for the individual organ's weights in Figure 4 with two exceptions: the individual epididymal weights tended ( $p = 0.07$ ) to be decreased by the DBP treatment and the seminal vesicle weights were only significantly decreased in the DBP + DEHP treatment group.

Histopathological analysis revealed that all phthalate treatments caused testicular lesions with the greatest percentage of males affected in the DBP + DEHP group. No testicular lesions were observed in any of the control testes. Testicular degeneration was observed in 14% of the DBP-treated males ( $p < 0.05$ ), 33% of the DEHP-treated males ( $p < 0.005$ ), and 75% of the DBP + DEHP-treated males ( $p < 0.001$ ). Interstitial cell hyperplasia was observed in all phthalate groups (DBP, 8% and DEHP, 12%) but only reached significance in the testes of the DBP + DEHP-treated males (45%;  $p < 0.001$ ).

#### Fetal Testis Steroid Hormone Production

Fetal testicular T production (ng T produced/testis/3 h) was significantly reduced in all three treatment groups versus control with a 29% decrease for DBP ( $p < 0.01$ ), a 52% reduction for DEHP ( $p < 0.0001$ ), and a 74% reduction for DBP + DEHP in combination ( $p < 0.0001$ ) (Fig. 5a). The reduced T production in the DBP + DEHP group was also

TABLE 3

Adult Male Rat Body Weight and Reproductive Tissue Weights After Prenatal Exposure to Corn Oil (Vehicle Control), DBP, DEHP, or DBP + DEHP (500 mg/kg/day per Individual Chemical) on GD14–18

| Tissue                   | Control          | DBP                          | DEHP                         | DBP + DEHP                    |
|--------------------------|------------------|------------------------------|------------------------------|-------------------------------|
| Body weight (g)          | 713.4 ± 14.0     | 713.2 ± 28.9                 | 705.3 ± 26.1                 | 633.7 ± 23.2                  |
| Glans penis (mg)         | 125.37 ± 1.77    | 124.65 ± 2.00                | 124.65 ± 1.58                | 114.93 ± 2.12 <sup>a</sup>    |
| Ventral prostate (mg)    | 741.95 ± 71.32   | 703.52 ± 55.98               | 728.63 ± 37.33               | 544.52 ± 43.37 <sup>b</sup>   |
| Seminal vesicles (mg)    | 2139.56 ± 107.92 | 1919.08 ± 130.84             | 1950.79 ± 181.23             | 984.64 ± 203.53 <sup>a</sup>  |
| Paired testes (mg)       | 3729.26 ± 137.58 | 3653.86 ± 209.46             | 3422.75 ± 245.27             | 2395.09 ± 191.69 <sup>a</sup> |
| Paired epididymides (mg) | 1354.14 ± 49.70  | 1309.96 ± 64.46              | 1094.25 ± 154.91             | 567.58 ± 186.82 <sup>a</sup>  |
| LABC (mg) <sup>c</sup>   | 1415.09 ± 35.81  | 1267.57 ± 66.92 <sup>d</sup> | 1245.37 ± 55.52 <sup>b</sup> | 884.42 ± 70.09 <sup>e</sup>   |

<sup>a</sup>Indicates value differs from control by  $p < 0.0005$ .

<sup>b</sup>Indicates value differs from control by  $p < 0.05$ .

<sup>c</sup> $n = 6$  litters per treatment, except DBP + DEHP with a total of four litters. Total number of males per treatment means were: control,  $n = 25$ ; DBP,  $n = 36$ – $37$ ; DEHP,  $n = 41$ – $42$ , and DBP + DEHP,  $n = 19$ – $20$ . Values are litter mean ± SEM.

<sup>d</sup>Indicates value differs from control by  $p = 0.07$ .

<sup>e</sup>Indicates value differs from control by  $p < 0.0001$ .

significantly different from either the DBP ( $p < 0.01$ ) or the DEHP ( $p < 0.05$ ) exposure groups. Fetal testicular P4 production (ng P4 produced/testis/3 h) was significantly reduced only in the DBP + DEHP combination dose ( $p < 0.05$ ) with a 32% reduction in P4 relative to control values (Fig. 5b). The DEHP exposure tended ( $p = 0.07$ ) to reduce fetal testicular P4 levels with a 27% reduction in the DEHP treatment group relative to control values. In contrast to phthalate-induced changes in fetal testicular hormone production, there were no treatment effects in adult T sera levels in prenatally exposed male SD rats (data not shown).

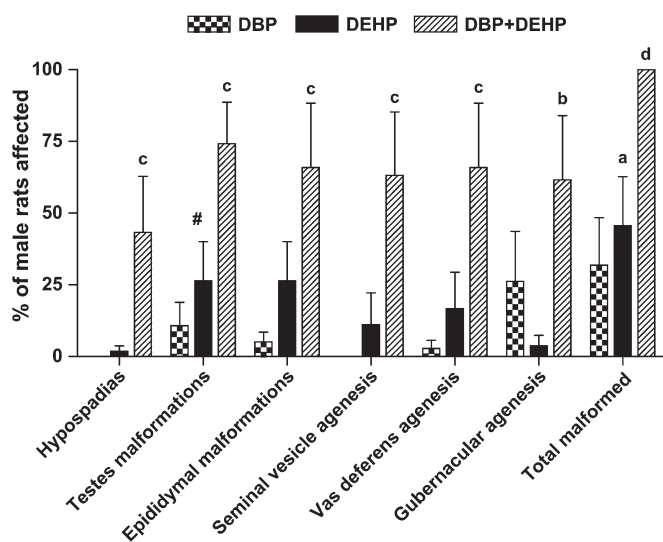

FIG. 2. External and internal reproductive abnormalities in adult male rats prenatally exposed to corn oil (control), DBP (500 mg/kg/day), and/or DEHP (500 mg/kg/day) on GD14–18. <sup>a</sup> $p < 0.05$ , <sup>b</sup> $p < 0.005$ , <sup>c</sup> $p < 0.001$ , <sup>d</sup> $p < 0.0001$ , and <sup>e</sup> $p = 0.07$  versus controls.  $n = 6$  litters per treatment, except DBP + DEHP with  $n = 4$  litters. Values are litter mean ± SEM. Control males did not exhibit reproductive abnormalities.

### Fetal Testis Gene Expression

The expression of *insl3* mRNA was significantly reduced in the treatment groups containing DEHP with a 47% reduction in mRNA for DEHP ( $p < 0.01$ ) and a 66% reduction in mRNA for DBP + DEHP in combination ( $p < 0.005$ ) relative to control values (Fig. 6a). The expression of *StAR* was significantly reduced by all phthalate exposures. The expression of *StAR* was decreased by DEHP alone or DBP + DEHP in combination with a 75% reduction in mRNA for DEHP ( $p < 0.05$ ) and an 81% reduction for DBP + DEHP ( $p < 0.05$ ) relative to control values, while DBP reduced *StAR* by only 49% ( $p = 0.05$ ) compared to controls (Fig. 6b). However, only the DBP + DEHP treatment reduced the *cyp11a* expression ( $p < 0.0005$ ) resulting in a 58% reduction relative to control values (Fig. 6c). The PCR results of *insl3*, *StAR*, and *cyp11a* were pooled by litter across PCR plates as there was no significant effect of PCR plate by treatment. The expression of *sf-1* was not significantly reduced by any of the phthalate treatments relative to control values (data not shown).

### Estimation of Response Addition versus Dose Addition

The dose-addition model most accurately estimated toxicity to the developmental and adult end points analyzed (Table 4). The DBP + DEHP-induced reduction in AGD at PND3 was accurately estimated by dose addition. The effects of DBP + DEHP on areolae retention at PND14 and nipple retention in adulthood (expressed as percent of 12 possible areolae/nipples) were best estimated by both dose and response addition. Response addition consistently underestimated the observed effects in the DBP + DEHP-treated males for the percent incidence of reproductive malformations and percent reduction of androgen-dependent organ weights (Table 4). In contrast, dose addition was the best fit for the DBP + DEHP-induced incidence of epididymal agenesis and the percent reduction of

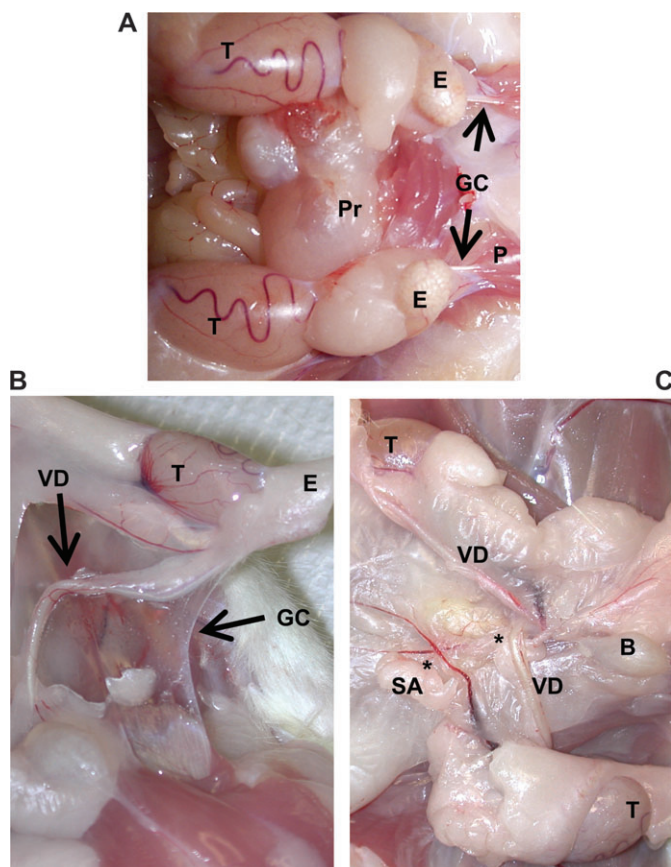

**FIG. 3.** Examples of gubernacular malformations observed in adult male rats prenatally treated with a mixture of DBP and DEHP (500 mg/kg day each chemical on GD14–18): (A) a normal gubernacular ligament (approximately 11 cm long) of a corn oil-treated (control) male, (B) an elongated gubernacular ligament measuring 50 mm long of a DBP + DEHP-treated male, and (C) crossed testes in a DBP + DEHP-treated male due to the absence of gubernacular cords. E, epididymis; GC, gubernacular cord; P, peritoneum; Pr, (ventral) prostate; SA, spermatic arteries; T, testis; B, bladder; and VD, vas deferens. \*Indicates location where labeled structures crossed one another. Orientation of the rat in each photograph: anterior to the left and caudal to the right.

weights of the epididymides, testes, LABC as well as vas deferens (DBP + DEHP = 70.0%, response addition = 23.5%, dose addition = 77.0%). While dose addition overestimated the effect of the DBP + DEHP dose for testicular malformations, dose addition (100%) appeared to be a better model than response addition (36.3%) with the observed effect of 75% incidence more closely resembling dose addition (Table 4). The DBP + DEHP induction of three reproductive malformations (hypospadias, gubernacular agenesis/hypoplasia, and seminal vesicle malformations) actually exceeded the response or dose-addition model predictions indicating that DBP + DEHP mixture had a statistically significant synergistic effect in inducing these malformations.

While we could not model dose addition for all end points, we assessed the ability of the response addition model to accurately predict the response to the DBP + DEHP mixture.

The percent reduction in fetal T and progesterone production by the DBP + DEHP treatment (observed: 74% and 37%, respectively) was accurately estimated by response addition (66% and 37%, respectively). Response addition also accurately estimated the percent decrease in *insl3* (62%) and *StAR* (87%) expression with the DBP + DEHP dose (observed: 66% and 81%, respectively). Of the fetal end points, only the percent decrease in *cyp11a* expression with the DBP + DEHP dose (58%) exceeded the response addition estimate (0%). It is possible that many of the fetal end points that fit the response addition model would also fit dose addition if individual phthalate dose-response data were available. We are planning to collect more data on the individual dose-response curves of DBP and DEHP to address the lack of fetal data as well as increase the accuracy of the adult reproductive effects modeling.

## DISCUSSION

DBP and DEHP are phthalate esters that interfere with male rat sexual differentiation by a common mechanism of action: an alteration of fetal Leydig cell development such that T and *insl3* hormone levels are reduced sufficiently to cause malformations of several reproductive tract tissues. Since they act via a common mechanism of action, we hypothesized that they would produce dose-additive effects on these tissues when coadministered during sexual differentiation. Regulatory agencies, such as the U.S. Environmental Protection Agency (USEPA), generally assume that chemicals that act via a common mechanism of action will act in a dose-additive manner (USEPA, 2002). Health Care Without Harm proposed that the phthalate esters should be assessed in a cumulative risk assessment using a toxic equivalency factor (TEF)-based model (DiGangi *et al.*, 2002). However, industry advocates challenged a TEF-based model for the phthalate esters, stating that there was no scientific basis for conducting a cumulative risk assessment on the phthalate esters because they act independently (i.e., response addition) and not cooperatively (i.e., dose addition; Stanley, 2002).

Data from the current study clearly demonstrate that DBP and DEHP, two phthalate esters that disrupt male rat sexual differentiation by the same mechanism of action although they do not share common metabolites, produce adverse reproductive effects that are best predicted by dose addition, but not response addition. The dose-addition model accurately predicted 11 of the 16 hormone (androgen and/or *insl3*)-dependent end points (Table 4). For four of the 11 end points predicted by dose addition, both dose and response addition models predicted the same outcome. None of the observed effects were uniquely predicted by response addition. In the remaining end points, the observed responses were either intermediate between dose and response addition (in 2/16 cases) or (in 3/16 cases) the observed effects were synergistic



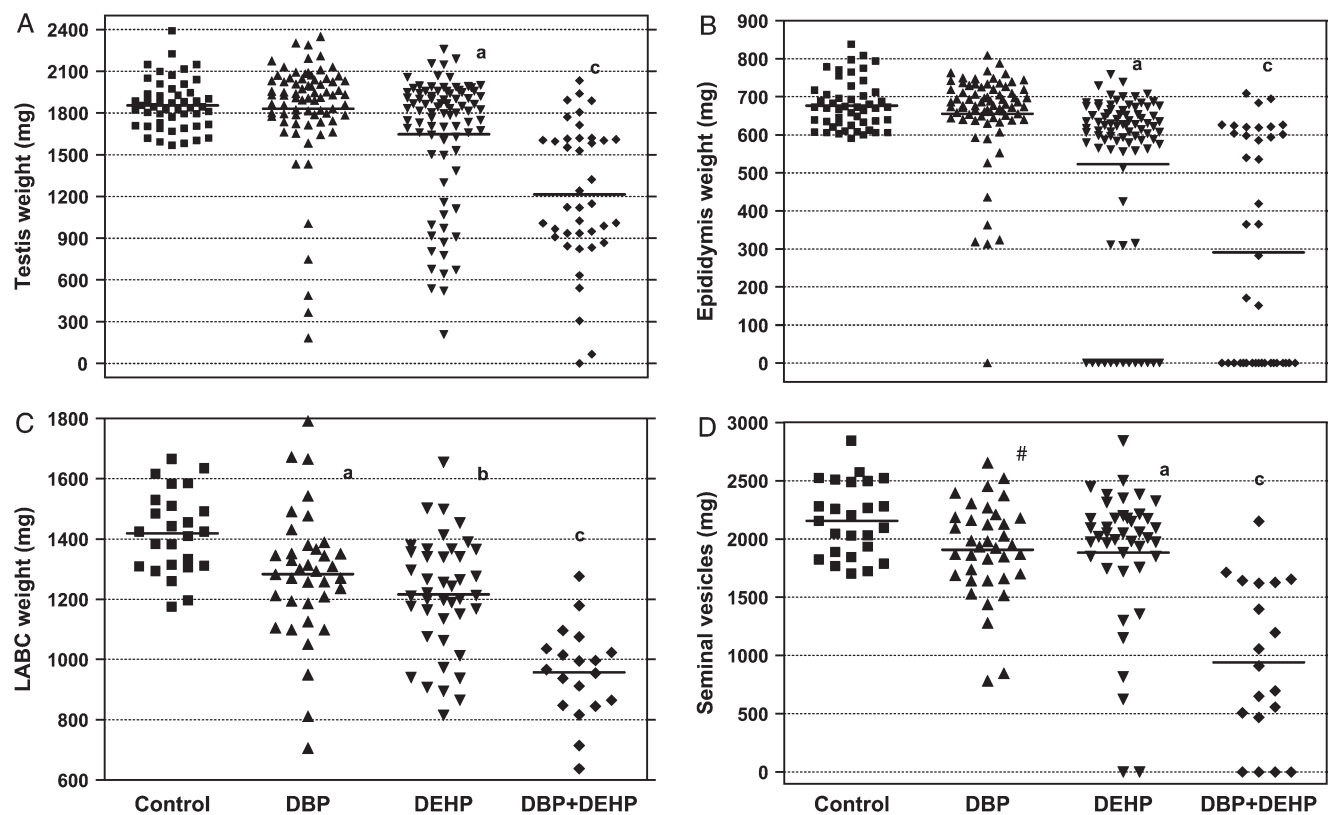

FIG. 4. Scatter plots of the individual tissue weights of the (A) testis, (B) epididymis, (C) LABC muscle, and (D) seminal vesicles in adult male rats prenatally exposed to corn oil (control), DBP (500 mg/kg/day), and/or DEHP (500 mg/kg/day) on GD14–18. Total number of males per treatment: control,  $n = 25$ ; DBP,  $n = 36$ – $37$ ; DEHP,  $n = 41$ – $42$ ; and DBP + DEHP,  $n = 19$ – $20$ . <sup>a</sup> $p < 0.05$ , <sup>b</sup> $p < 0.005$ , <sup>c</sup> $p < 0.0001$ , and # $p = 0.07$  compared to controls by two-way ANOVA. Values are individual mean  $\pm$  SEM.

using the USEPA definition of synergy as significantly greater than additive (USEPA, 2002). We are currently planning an expanded study with several levels of the DBP + DEHP mixture to improve our modeling of the effects of this phthalate mixture on the reproductive tract tissues and to further examine the nature of the interaction of these two phthalates on the end points that responded synergistically in the current study. Taken together, the data indicate that DBP and DEHP primarily interacted in a dose-additive manner in this study as predicted based upon their common mechanism of toxicity during sexual differentiation.

The potential for DBP and DEHP to produce cumulative, dose-additive effects in rodents *in utero* raises concerns for the effects of phthalate ester mixtures in the human fetus during sexual differentiation since human amniotic fluids may contain this mixture. Silva *et al.* (2004b) reported that metabolites MBP and MEHP were detected in 93 and 24%, respectively, of 54 human amniotic fluid samples tested. Although the median levels of the DBP and DEHP metabolites were very low, 2% of the human amniotic fluid samples had MBP and MEHP levels that differed by only five- and 24-fold, respectively, from the levels in rat amniotic fluid (Calafat *et al.*, 2006) from dams treated with oral dosage levels near their LOAELs (Mylchreest

*et al.*, 2000; Gray, unpublished data). Strikingly, the margin of exposure in amniotic fluid samples between effective doses in rats and the maximum levels in human amniotic fluid is well below 100-fold. In addition, high MBP levels (ppm) have been detected in humans using pharmaceuticals containing DBP (Hauser *et al.*, 2004).

Based upon the fact that the androgen synthesis pathway is highly conserved among rats and humans, and prenatal exposure to phthalates has demonstrable effects on rat sexual differentiation, some public health advocacy groups have raised concerns that exposure to multiple phthalates could result in adverse effects on human reproductive development (DiGangi *et al.*, 2002; Purvis and Gibson, 2005). Indeed, Swan *et al.* (2005) recently reported an association between higher maternal blood levels of phthalate metabolites during pregnancy in women and shorter anogenital index (body weight-adjusted AGD) in their male offspring, suggesting that the maternal phthalate load suppressed androgen levels *in utero*. The hypothesis of this human epidemiological study was based, in part, upon the phthalate metabolites acting in a cumulative fashion.

A second objective of the current study, beyond determining if the phthalate ester mixture acted in a dose-additive fashion,

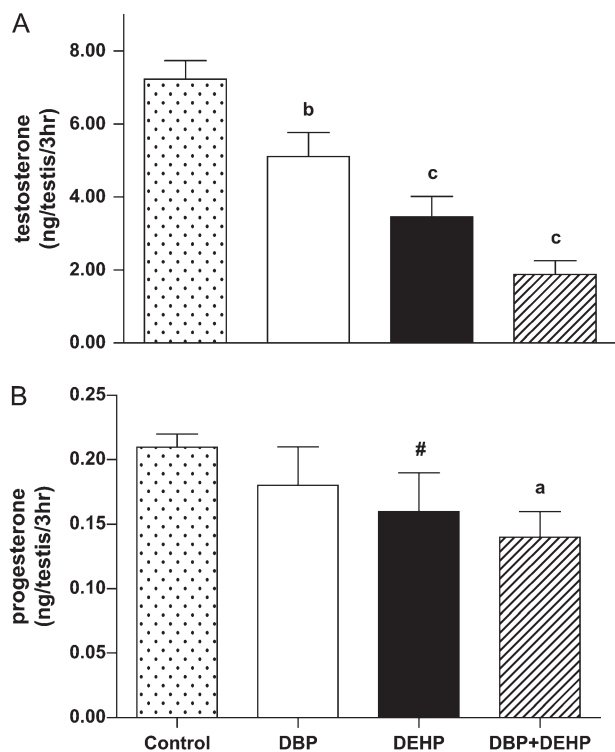

FIG. 5. Testicular production of T (A) and progesterone (B) in GD18 rat fetuses exposed to corn oil (control), DBP (500 mg/kg/day), and/or DEHP (500 mg/kg/day) on GD14–18. <sup>a</sup> $p < 0.05$ , <sup>b</sup> $p < 0.01$ , <sup>c</sup> $p < 0.0001$ , and <sup>#</sup> $p = 0.06$  versus controls.  $n = 6$  litters per treatment, except DBP + DEHP with  $n = 5$  litters. Values are litter mean  $\pm$  SEM.

was to determine if the hormones and genes that are causally related to these lesions were also more affected by the DBP + DEHP treatment versus DBP or DEHP alone. We are presently unable to make dose additivity predictions since we have not collected individual dose-response data for the fetal end points; however, the results of the current study indicate that cumulative effects were seen in fetal testicular T production and the expression of *insl3* and *Cyp11a*.

Prenatal DBP + DEHP exposure of male rats resulted in cumulative inhibition of *insl3* expression, which likely caused a cumulative increase in the incidence of gubernacular malformations. The most unique malformation observed in the phthalate-treated males was cryptorchidism, where the gubernacular cords were either underdeveloped or absent, which often impaired the normal descent of testis into the scrotal sac. Cryptorchidism and/or the general underdevelopment of the gubernacular cords is a common “high-dose” malformation noted in phthalate studies from our laboratory (Gray *et al.*, 2000) and others (Foster, 2006; McKinnell *et al.*, 2005; Tyl *et al.*, 2004); this malformation is not seen with other classes of antiandrogenic chemicals. The peptide hormone *insl3* is secreted by the Leydig cells and is responsible for normal gubernacular development, which facilitates the first phase of testicular descent (from the kidney area to the inguinal

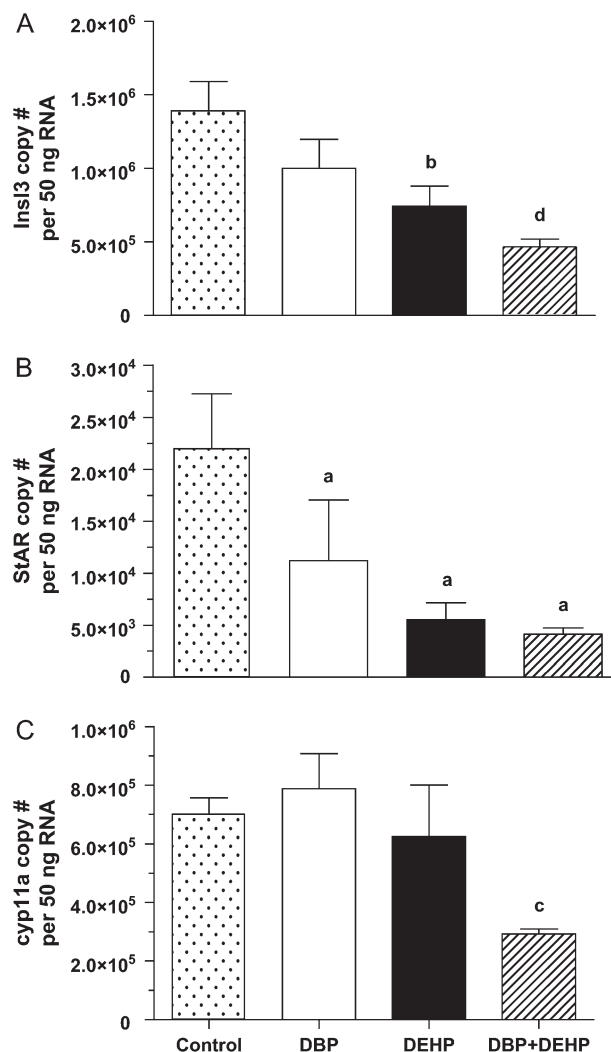

FIG. 6. Fetal testes gene expression of insulin-like peptide 3 (*insl3*; A), steroidogenic acute regulatory protein (*StAR*; B), and *cyp11a* (C) in GD18 rat fetuses exposed to corn oil (control), DBP (500 mg/kg/day), and/or DEHP (500 mg/kg/day) on GD14–18. <sup>a</sup> $p \leq 0.05$ , <sup>b</sup> $p < 0.01$ , <sup>c</sup> $p < 0.005$ , <sup>d</sup> $p < 0.0005$  versus controls.  $n = 6$  litters per treatment, except DBP + DEHP with  $n = 5$  litters. Values are litter mean  $\pm$  SEM.

region) in the developing male fetus (Zimmermann *et al.*, 1999). In the male rat, testicular expression of *insl3* is highest during late fetal development (GD17.5–19.5), after which time expression subsides until it is high again during puberty and adulthood (McKinnell *et al.*, 2005). The inhibition of fetal testicular *insl3* gene expression by phthalate exposure was first reported by our research group (Wilson *et al.*, 2004) and has since been confirmed by others (Lehmann *et al.*, 2004; McKinnell *et al.*, 2005). As the assay becomes more available, we plan to measure the levels of *insl3* peptide hormone production and testicular tissue content to better characterize the effect of the phthalate esters on Leydig cell production of this hormone. It is possible that the production of *insl3* peptide

TABLE 4

Summary of Observed Effects in Male Rats Prenatally Exposed to DBP, DEHP, or DBP + DEHP (500 mg/kg/day per Individual Chemical) versus Predictions of Response Addition (RA) and Dose Addition (DA) for the DBP + DEHP Group. Values for Malformations and Areola/Nipple Retention Are Expressed as the Percentage of Animals Affected, whereas AGD and Organ Weights Are Shown as Percent Reduction from Controls  $\pm$  99% Confidence Limits. The Entries in Bold Represent The Best Model

| Androgen- and InsI3-dependent alterations | Observed effects |      |                 | Model predictions for DBP + DEHP |            | Best model (interaction, if any) |
|-------------------------------------------|------------------|------|-----------------|----------------------------------|------------|----------------------------------|
|                                           | DBP              | DEHP | DBP + DEHP      | RA                               | DA         |                                  |
| AGD on PND3                               | 9.2              | 9.8  | 27.8 $\pm$ 5.5  | 18.1                             | <b>31</b>  | DA                               |
| Areolae retention (% of 12 possible)      | 22.0             | 25.4 | 66.4            | <b>41.8</b>                      | <b>100</b> | RA and DA                        |
| Hypospadias                               | 0                | 2.4  | 25              | 2.4                              | 0          | Observed > RA or DA (synergy)    |
| Epididymal agenesis                       | 5.4              | 28.6 | 70              | 32.4                             | <b>87</b>  | DA                               |
| Vas deferens agenesis                     | 2.7              | 21.4 | 70              | 23.5                             | <b>77</b>  | DA                               |
| Testis malformations                      | 10.8             | 28.6 | 75              | 36.3                             | 100        | DA > observed > RA               |
| Gubernacular agenesis/hypoplasia          | 27               | 4.8  | 75              | 30.5                             | 27         | Observed > RA or DA (synergy)    |
| Seminal vesicle malformations             | 0                | 14.3 | 65              | 14.3                             | 11         | Observed > RA or DA (synergy)    |
| Nipple retention (% of 12 possible)       | 7.4              | 17.3 | 31.7            | <b>23.4</b>                      | <b>29</b>  | RA and DA                        |
| Total malformed males                     | 31.7             | 45.5 | 100             | 62.8                             | <b>100</b> | DA                               |
| Paired epididymal weight                  | 3.2              | 22.8 | 57 $\pm$ 23.5   | 25.3                             | <b>80</b>  | DA                               |
| Paired testis weight                      | 1.3              | 10   | 34.6 $\pm$ 13.3 | 10.8                             | <b>27</b>  | DA                               |
| Seminal vesicle weight                    | 11.5             | 12.6 | 56.4 $\pm$ 21.1 | 22.7                             | 100        | DA > observed > RA               |
| LABC weight                               | 9.6              | 14.3 | 32.5 $\pm$ 7.1  | 22.5                             | <b>33</b>  | DA                               |
| Glans penis weight                        | 0.1              | 0.4  | 8.5 $\pm$ 8.4   | <b>0.5</b>                       | <b>0</b>   | RA and DA                        |
| Ventral prostate weight                   | 4.5              | 4.4  | 24.7 $\pm$ 19.3 | <b>8.7</b>                       | <b>12</b>  | RA and DA                        |

hormone may be more sensitive to phthalate exposure than *insl3* mRNA expression.

The inhibition of fetal testicular steroid hormone production and associated gene expression due to prenatal phthalate exposure likely induced the reproductive malformations and the decrease in androgen-dependent tissue weights in adult prenatally exposed male rats. While fetal testicular T production was suppressed by all phthalate treatments, fetal testicular P4 production was suppressed only by the DBP + DEHP dose indicating that the phthalates were impacting a point in the steroidogenic pathway further upstream of the 3 beta-hydroxysteroid dehydrogenase enzyme. Thus, we measured the expression of the side-chain cleavage enzyme gene *cyp11a*, a rate-limiting enzyme responsible for the conversion of cholesterol to pregnenolone, and *StAR*, a gene encoding the protein responsible for shuttling cholesterol into the mitochondria to begin the steroidogenic pathway. Exposure to DBP (500 mg/kg/day) from GD11–18 is known to inhibit fetal expression of *cyp11a* and *StAR* (Barlow *et al.*, 2003; Lehmann *et al.*, 2004). However, *cyp11a* expression was only significantly suppressed by the DBP + DEHP dose with our 5-day dosing regime. While *StAR* expression was significantly suppressed by DBP and DEHP treatments, the magnitude of the suppression of *StAR* expression by the DBP + DEHP treatment was similar

to DEHP, suggesting that *StAR* was maximally inhibited by the 500 mg/kg/day DEHP dose and that further suppression of expression with the DBP + DEHP mixture was not possible. Similar to Thompson *et al.* (2004), we did not observe phthalate ester effects on the expression of *sf-1*, a known regulator of *StAR* and *cyp11a* genes (Parker, 1998). However, *sf-1* is essential for normal testis differentiation from an indifferent gonad, which occurs earlier in fetal life than the stage of development assessed in the current study.

Maternal body weight gain and postimplantation embryo/neonatal loss also displayed cumulative responses to DBP + DEHP treatment, likely due to the high amount of total phthalate esters administered to the dam. Reductions in maternal body weight gain relative to control dams have been observed with daily dosing of > 500 mg DBP/kg/day regimes during pregnancy of (Mylchreest *et al.*, 1999) and DEHP (Gray *et al.*, 2000; Jarfelt *et al.*, 2005; Parks *et al.*, 2000). The postimplantation embryo/neonatal loss may have been due, in part, to phthalate-induced suppression of P4 in the rat dams in mid-late pregnancy (Gray *et al.*, 2006a).

In conclusion, the dose-additive effects of prenatal exposure on the male rat reproductive system demonstrated by our current study and the striking association of multiple phthalate metabolites on the anogenital index in human infants

emphasize the need for more research to assess the cumulative effects of phthalates, and mixtures of other antiandrogens, in combination with each other. It is noteworthy that the dose-addition model, which assumes that the chemicals are acting via a common mechanism of action, was predictive of the majority of the androgen-dependent end points measured in the DBP + DEHP-exposed male offspring. As hormone-dependent development in rats shares considerable evolutionary conservation to humans, the cumulative increase in reproductive malformations and decreased reproductive organ weights due to prenatal exposure to the DBP + DEHP mixture is a factor that warrants consideration in future risk assessments on phthalate esters as well as other chemicals known to impact the T pathway. Future experiments are needed to address how closely fetal testicular hormone production and gene expression changes are associated with, and thus predictive of, reproductive malformations in adulthood.

#### ACKNOWLEDGMENTS

We thank Dr Cynthia Wolf (USEPA) for her assistance during necropsies. We would also like to thank Carmen Wood and the late Dr Gary Held (USEPA) for their assistance in designing qPCR primer and probes. Finally, we thank Dr Rochelle Tyl (Research Triangle Institute) for her editorial advice on a previous draft of this manuscript. Grant support: K.L.H. was funded by the North Carolina State University/USEPA Cooperative Training program in Environmental Sciences Research, Training Agreement CT826512010 during this project.

#### REFERENCES

- Albro, P. W., and Lavenhar, S. R. (1989). Metabolism of di(2-ethylhexyl)-phthalate. *Drug Metab. Rev.* **21**, 13–34.
- Barlow, N. J., Phillips, S. L., Wallace, D. G., Sar, M., Gaido, K. W., and Foster, P. M. (2003). Quantitative changes in gene expression in fetal rat testes following exposure to di(n-butyl) phthalate. *Toxicol. Sci.* **73**, 431–441.
- Blount, B. C., Silva, M. J., Caudill, S. P., Needham, L. L., Pirkle, J. L., Sampson, E. J., Lucier, G. W., Jackson, R. J., and Brock, J. W. (2000). Levels of seven urinary phthalate metabolites in a human reference population. *Environ. Health Perspect.* **108**, 979–982.
- Calafat, A. M., Brock, J. W., Silva, M. J., Gray, L. E., Jr, Reidy, J. A., Barr, D. B., and Needham, L. L. (2006). Urinary and amniotic fluid levels of phthalate monoesters in rats after the oral administration of di(2-ethylhexyl) phthalate and di-n-butyl phthalate. *Toxicology* **217**, 22–30.
- DiGangi, J., Schettler, T., Cobbing, M., and Rossi, M. (2002). *Aggregate Exposures to Phthalates in Humans*, pp. 1–49. Health Care Without Harm, Washington DC.
- Foster, P. M. (2006). Disruption of reproductive development in male rat offspring following in utero exposure to phthalate esters. *Int. J. Androl.* **29**, 140–147.
- Gray, L. E., Jr, Laskey, J., and Ostby, J. (2006a). Chronic di-n-butyl phthalate exposure in rats reduces fertility and alters ovarian function during pregnancy in female Long Evans hooded rats. *Toxicol. Sci.* **93**, 189–195.
- Gray, L. E., Jr, Ostby, J., Furr, J., Price, M., Veeramachaneni, D. N., and Parks, L. (2000). Perinatal exposure to the phthalates DEHP, BBP, and DINP, but not DEP, DMP, or DOTP, alters sexual differentiation of the male rat. *Toxicol. Sci.* **58**, 350–365.
- Gray, L. E., Jr, Wilson, V. S., Stoker, T., Lambright, C., Furr, J., Noriega, N., Howdeshell, K., Ankley, G. T., and Guillette, L. (2006b). Adverse effects of environmental antiandrogens and androgens on reproductive development in mammals. *Int. J. Androl.* **29**, 96–104.
- Gray, L. E., Jr, Wolf, C., Lambright, C., Mann, P., Price, M., Cooper, R. L., and Ostby, J. (1999). Administration of potentially antiandrogenic pesticides (procymidone, linuron, iprodione, chlozolinate, p,p'-DDE, and ketoconazole) and toxic substances (dibutyl- and diethylhexyl phthalate, PCB 169, and ethane dimethane sulphonate) during sexual differentiation produces diverse profiles of reproductive malformations in the male rat. *Toxicol. Ind. Health* **15**, 94–118.
- Green, R., Hauser, R., Calafat, A. M., Weuve, J., Schettler, T., Ringer, S., Huttner, K., and Hu, H. (2005). Use of di(2-ethylhexyl) phthalate-containing medical products and urinary levels of mono(2-ethylhexyl) phthalate in neonatal intensive care unit infants. *Environ. Health Perspect.* **113**, 1222–1225.
- Hauser, R., Duty, S., Godfrey-Bailey, L., and Calafat, A. M. (2004). Medications as a source of human exposure to phthalates. *Environ. Health Perspect.* **112**, 751–753.
- Hotchkiss, A. K., Parks-Saldutti, L. G., Ostby, J. S., Lambright, C., Furr, J., Vandenberg, J. G., and Gray, L. E., Jr. (2004). A mixture of the “antiandrogens” linuron and butyl benzyl phthalate alters sexual differentiation of the male rat in a cumulative fashion. *Biol. Reprod.* **71**, 1852–1861.
- Ivell, R., and Bathgate, R. A. (2002). Reproductive biology of the relaxin-like factor (RLF/INSL3). *Biol. Reprod.* **67**, 699–705.
- Jarfelt, K., Dalgaard, M., Hass, U., Borch, J., Jacobsen, H., and Ladefoged, O. (2005). Antiandrogenic effects in male rats perinatally exposed to a mixture of di(2-ethylhexyl) phthalate and di(2-ethylhexyl) adipate. *Reprod. Toxicol.* **19**, 505–515.
- Kolpin, D. W., Furlong, E. T., Meyer, M. T., Thurman, E. M., Zaugg, S. D., Barber, L. B., and Buxton, H. T. (2002). Pharmaceuticals, hormones, and other organic wastewater contaminants in U.S. streams, 1999–2000: A national reconnaissance. *Environ. Sci. Technol.* **36**, 1202–1211.
- Latini, G., De Felice, C., Presta, G., Del Vecchio, A., Paris, I., Ruggieri, F., and Mazzeo, P. (2003). In utero exposure to di-(2-ethylhexyl)phthalate and duration of human pregnancy. *Environ. Health Perspect.* **111**, 1783–1785.
- Lehmann, K. P., Phillips, S., Sar, M., Foster, P. M., and Gaido, K. W. (2004). Dose-dependent alterations in gene expression and testosterone synthesis in the fetal testes of male rats exposed to di (n-butyl) phthalate. *Toxicol. Sci.* **81**, 60–68.
- Mahood, I. K., Hallmark, N., McKinnell, C., Walker, M., Fisher, J. S., and Sharpe, R. M. (2005). Abnormal Leydig Cell aggregation in the fetal testis of rats exposed to di (n-butyl) phthalate and its possible role in testicular dysgenesis. *Endocrinology* **146**, 613–623.
- McKinnell, C., Sharpe, R. M., Mahood, K., Hallmark, N., Scott, H., Ivell, R., Staub, C., Jegou, B., Haag, F., Koch-Nolte, F., et al. (2005). Expression of insulin-like factor 3 protein in the rat testis during fetal and postnatal development and in relation to cryptorchidism induced by in utero exposure to di (n-butyl) phthalate. *Endocrinology* **146**, 4536–4544.
- Mortensen, G. K., Main, K. M., Andersson, A. M., Leffers, H., and Skakkebaek, N. E. (2005). Determination of phthalate monoesters in human milk, consumer milk, and infant formula by tandem mass spectrometry (LC-MS-MS). *Anal. Bioanal. Chem.* **382**, 1084–1092.
- Mylchreest, E., Sar, M., Cattley, R. C., and Foster, P. M. (1999). Disruption of androgen-regulated male reproductive development by di(n-butyl) phthalate during late gestation in rats is different from flutamide. *Toxicol. Appl. Pharmacol.* **156**, 81–95.
- Mylchreest, E., Wallace, D. G., Cattley, R. C., and Foster, P. M. (2000). Dose-dependent alterations in androgen-regulated male reproductive development in rats exposed to di(n-butyl) phthalate during late gestation. *Toxicol. Sci.* **55**, 143–151.

- Parker, K. L. (1998). The roles of steroidogenic factor 1 in endocrine development and function. *Mol. Cell. Endocrinol.* **145**, 15–20.
- Parks, L. G., Ostby, J. S., Lambright, C. R., Abbott, B. D., Klinefelter, G. R., Barlow, N. J., and Gray, L. E., Jr. (2000). The plasticizer diethylhexyl phthalate induces malformations by decreasing fetal testosterone synthesis during sexual differentiation in the male rat. *Toxicol. Sci.* **58**, 339–349.
- Purvis, M., and Gibson, R. (2005). *The Right Start: The Need to Eliminate Toxic Chemicals from Baby Products*, pp. 1–32. U.S. Public Interest Research Group Education Fund, Washington, DC.
- Rider, C. V., and LeBlanc, G. A. (2005). An integrated addition and interaction model for assessing toxicity of chemical mixtures. *Toxicol. Sci.* **87**, 520–528.
- Silva, M. J., Barr, D. B., Reidy, J. A., Malek, N. A., Hodge, C. C., Caudill, S. P., Brock, J. W., Needham, L. L., and Calafat, A. M. (2004a). Urinary levels of seven phthalate metabolites in the U.S. population from the National Health and Nutrition Examination Survey (NHANES) 1999–2000. *Environ. Health Perspect.* **112**, 331–338.
- Silva, M. J., Reidy, J. A., Herbert, A. R., Preau, J. L., Jr, Needham, L. L., and Calafat, A. M. (2004b). Detection of phthalate metabolites in human amniotic fluid. *Bull. Environ. Contam. Toxicol.* **72**, 1226–1231.
- Silva, M. J., Reidy, J. A., Samandar, E., Herbert, A. R., Needham, L. L., and Calafat, A. M. (2005). Detection of phthalate metabolites in human saliva. *Arch. toxicol.* **79**, 647–652.
- Stanley, M. (2002). *Some Incorrect Statements by Health Care Without Harm: Phthalate Esters Panel of the American Chemistry Council Response to HCWH Report on “Aggregate Exposures to Phthalates in Humans”*. American Chemistry Council Phthalate Ester Panel. Available at: [http://www.phthalates.org/mediacenter/pep\\_2002\\_7\\_10\\_2.asp](http://www.phthalates.org/mediacenter/pep_2002_7_10_2.asp). Accessed May 7, 2007.
- Swan, S. H., Main, K. M., Liu, F., Stewart, S. L., Kruse, R. L., Calafat, A. M., Mao, C. S., Redmon, J. B., Ternand, C. L., Sullivan, S., et al. (2005). Decrease in anogenital distance among male infants with prenatal phthalate exposure. *Environ. Health Perspect.* **113**, 1056–1061.
- Tanaka, A., Matsumoto, A., and Yamaha, T. (1978). Biochemical studies on phthalic esters. III. Metabolism of dibutyl phthalate (DBP) in animals. *Toxicology* **9**, 109–123.
- Thompson, C. J., Ross, S. M., and Gaido, K. W. (2004). Di(n-butyl) phthalate impairs cholesterol transport and steroidogenesis in the fetal rat testis through a rapid and reversible mechanism. *Endocrinology* **145**, 1227–1237.
- Tyl, R. W., Myers, C. B., Marr, M. C., Fail, P. A., Seely, J. C., Brine, D. R., Barter, R. A., and Butala, J. H. (2004). Reproductive toxicity evaluation of dietary butyl benzyl phthalate (BBP) in rats. *Reprod. Toxicol.* **18**, 241–264.
- U.S. Congress (1996). *Food Quality Protection Act of 1996*. Public Law 104–170, pp. 1–50. U.S. Government Printing Office, Washington, D.C.
- U.S. Environmental Protection Agency, USEPA (2002). *Guidance on Cumulative Risk Assessment of Pesticide Chemicals that have a Common Mechanism of Toxicity*. Office of Pesticides, Office of Pesticide Programs, Pesticides and Toxic Substances, Washington, DC, pp. 1–90. Available at: [http://www.epa.gov/pesticides/trac/science/cumulative\\_toxicity.pdf](http://www.epa.gov/pesticides/trac/science/cumulative_toxicity.pdf). Accessed May 7, 2007.
- Williams, D. T., and Blanchfield, B. J. (1975). The retention, distribution, excretion, and metabolism of dibutyl phthalate-7-14 C in the rat. *J. Agric. Food Chem.* **23**, 854–858.
- Wilson, V. S., Lambright, C., Furr, J., Ostby, J., Wood, C., Held, G., and Gray, L. E., Jr. (2004). Phthalate ester-induced gubernacular lesions are associated with reduced insl3 gene expression in the fetal rat testis. *Toxicol. Lett.* **146**, 207–215.
- Zimmermann, S., Steding, G., Emmen, J. M., Brinkmann, A. O., Nayernia, K., Holstein, A. F., Engel, W., and Adham, I. M. (1999). Targeted disruption of the Ins13 gene causes bilateral cryptorchidism. *Mol. Endocrinol.* **13**, 681–691.
